# Supplementary material for: Serum‑derived exosomal hsa‑let‑7b‑5p as a biomarker for predicting the severity of coronary stenosis in patients with coronary heart disease and hyperglycemia
Source: PubMed Central journal article supplement — Mol Med Rep. 2023 Sep 12;28(5):203. doi: 10.3892/mmr.2023.13090 (PMC10539999; doi:10.3892/mmr.2023.13090), 2023-09-12

Figure S1. Isolation and identification of exosomes. (A) Morphology of exosomes isolated from serum samples was identified by transmission electron microscopy. (B) Size of exosomes ranged from 30-150 nm. (C) Western blot analysis of the expression levels of exosome marker proteins, including CD63, TSG101 and HSP70, in the exosomes. HSP70, heat-shock 70; TSG101, tumor susceptibility gene 101.

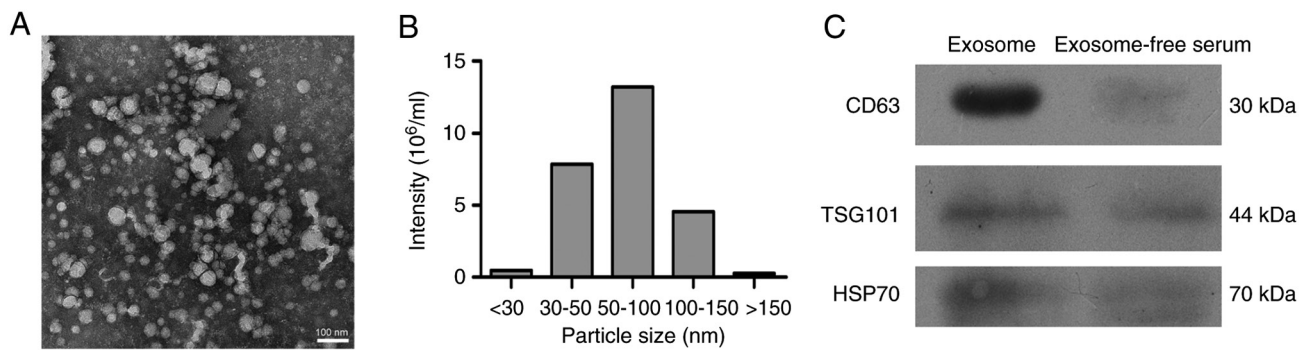

Supplement: Supplementary_Data1.pdf [file Supplementary_Data1.pdf]
