# Supplementary material for: Serum‑derived exosomal hsa‑let‑7b‑5p as a biomarker for predicting the severity of coronary stenosis in patients with coronary heart disease and hyperglycemia
Source: PubMed Central journal article supplement — Mol Med Rep. 2023 Sep 12;28(5):203. doi: 10.3892/mmr.2023.13090 (PMC10539999; doi:10.3892/mmr.2023.13090), 2023-09-12
Supplement: Supplementary_Data2.pdf [file Supplementary_Data2.pdf]

**Table SI.** Clinical characteristics of patients with CHD for human miRNA microarray analysis.

| <b>Characteristic</b>      | <b>Patients with CHD and hyperglycemia (n=8)</b> | <b>Patients with CHD and normoglycemia (n=8)</b> |
|----------------------------|--------------------------------------------------|--------------------------------------------------|
| Age, years                 | 61 (54, 69)                                      | 62 (52, 70)                                      |
| Sex, female/male           | 5/3                                              | 4/4                                              |
| BMI, kg/m <sup>2</sup>     | 24.56 (21.30, 28.26)                             | 25.90 (22.05, 27.70)                             |
| SBP, mmHg                  | 135 (121, 156)                                   | 130 (118, 155)                                   |
| DBP, mmHg                  | 71 (63, 84)                                      | 73 (66, 82)                                      |
| TC, mmol/l                 | 3.77 (3.12, 4.50)                                | 4.04 (2.98, 4.62)                                |
| TG, mmol/l                 | 1.94 (1.15, 2.47)                                | 1.80 (1.34, 2.49)                                |
| LDL-C, mmol/l              | 2.25 (1.36, 2.86)                                | 2.09 (1.52, 3.22)                                |
| HDL-C, mmol/l              | 1.03 (0.84, 1.40)                                | 1.18 (0.77, 1.59)                                |
| Hba1c, %                   | 9.46 (8.22, 10.78)                               | 4.95 (4.43, 5.53)                                |
| FBG, mmol/l                | 8.17 (6.50, 9.29)                                | 4.91 (4.06, 5.72)                                |
| Number of stenotic vessels | 2.65 (2.12, 3.30)                                | 2.13 (1.64, 2.38)                                |
| Severity of stenosis, %    | 74.28 (66.53, 85.47)                             | 61.35 (43.10, 73.25)                             |
| SYNTAX score               | 30.0 (23.50, 36.0)                               | 23.0 (14.0, 29.0)                                |

Data are expressed as the median (interquartile range). BMI, body mass index; DBP, diastolic blood pressure; FBG, fasting blood glucose; Hba1c, hemoglobin A1C; HDL-C, high-density lipoprotein cholesterol; LDL-C, low-density lipoprotein cholesterol; SBP, systolic blood pressure; SYNTAX, Synergy between Percutaneous Coronary Intervention with Taxus and Cardiac Surgery; TC, total cholesterol; TG, triglyceride.

**Table SII.** Spearman correlation analysis of the correlations between expression levels of the 10 differentially expressed miRNAs and biochemical parameters in patients with CHD and hyperglycemia.

| miRNA           | Correlation coefficient, rho-values |        |        |        |                     |        |                    |
|-----------------|-------------------------------------|--------|--------|--------|---------------------|--------|--------------------|
|                 | TC                                  | TG     | LDL-C  | HDL-C  | Hba1c               | FBG    | SYNTAX score       |
| hsa-let-7b-5p   | 0.114                               | -0.105 | -0.124 | 0.015  | 0.463 <sup>a</sup>  | 0.213  | 0.671 <sup>a</sup> |
| hsa-miR-4313    | 0.089                               | 0.113  | -0.153 | -0.038 | 0.173               | 0.283  | 0.271              |
| hsa-miR-4665-3p | 0.145                               | -0.246 | 0.164  | -0.075 | -0.006              | 0.193  | 0.228              |
| hsa-miR-940     | 0.003                               | -0.264 | 0.167  | -0.135 | 0.347 <sup>b</sup>  | -0.055 | -0.285             |
| hsa-miR-4459    | 0.138                               | 0.081  | 0.182  | 0.258  | -0.282              | 0.032  | 0.385 <sup>b</sup> |
| hsa-miR-4687-3p | -0.014                              | 0.247  | -0.142 | -0.208 | 0.112               | -0.005 | 0.106              |
| hsa-miR-6087    | -0.194                              | -0.297 | 0.079  | 0.235  | -0.561 <sup>a</sup> | -0.167 | -0.180             |
| hsa-miR-6089    | 0.239                               | 0.164  | -0.224 | -0.035 | 0.105               | 0.116  | 0.039              |
| hsa-miR-6740-5p | 0.012                               | -0.242 | 0.073  | 0.193  | -0.033              | -0.183 | -0.192             |
| hsa-miR-6800-5p | -0.149                              | 0.229  | 0.013  | -0.281 | -0.441 <sup>a</sup> | 0.171  | 0.254              |

<sup>a</sup>P<0.001, <sup>b</sup>P<0.01. FBG, fasting blood glucose; Hba1c, hemoglobin A1C; HDL-C, high-density lipoprotein cholesterol; LDL-C, low-density lipoprotein cholesterol; miRNA/miR, microRNA; SYNTAX, Synergy between Percutaneous Coronary Intervention with Taxus and Cardiac Surgery; TC, total cholesterol; TG, triglyceride.

**Table SIII.** AUC, cut-off value, sensitivity and specificity of the 10 differentially expressed miRNAs for discriminating high SYNTAX score from low SYNTAX score in patients with CHD and hyperglycemia.

| miRNA           | AUC   | 95% CI      | Cut-off value | Sensitivity | Specificity | P-value             |
|-----------------|-------|-------------|---------------|-------------|-------------|---------------------|
| hsa-let-7b-5p   | 0.930 | 0.875-0.985 | 2.735         | 0.792       | 0.954       | <0.001 <sup>a</sup> |
| hsa-miR-4313    | 0.632 | 0.501-0.764 | 1.765         | 0.434       | 0.863       | 0.071               |
| hsa-miR-4665-3p | 0.546 | 0.408-0.684 | 0.620         | 0.509       | 0.727       | 0.529               |
| hsa-miR-940     | 0.509 | 0.371-0.647 | 4.485         | 0.339       | 0.863       | 0.898               |
| hsa-miR-4459    | 0.588 | 0.455-0.722 | 1.430         | 0.339       | 0.909       | 0.228               |
| hsa-miR-4687-3p | 0.525 | 0.380-0.671 | 4.20          | 0.471       | 0.681       | 0.727               |
| hsa-miR-6087    | 0.587 | 0.437-0.738 | 7.475         | 0.717       | 0.50        | 0.233               |
| hsa-miR-6089    | 0.512 | 0.363-0.660 | 3.870         | 0.584       | 0.50        | 0.870               |
| hsa-miR-6740-5p | 0.547 | 0.403-0.690 | 0.785         | 0.226       | 0.954       | 0.522               |
| hsa-miR-6800-5p | 0.666 | 0.532-0.80  | 2.545         | 0.339       | 0.955       | 0.024 <sup>b</sup>  |

<sup>a</sup>P<0.001, <sup>b</sup>P<0.05. AUC, area under the curve; CI, confidence interval; miRNA/miR, microRNA.
